# Supplementary material for: Photocatalytic activity of silicon-based nanoflakes for the decomposition of nitrogen monoxide
Source: Royal Society of Chemistry journal article supplement (doi:10.1039/c7dt01682d), 2017-01-01
Supplement: c7dt01682d1.pdf [file c7dt01682d1.pdf]

## Supplementary Information for Photocatalytic Activity of Silicon-based Nanoflakes for the Decomposition of Nitrogen Monoxide

Hiroshi Itahara<sup>a,\*</sup>, Xiaoyong Wu<sup>b</sup>, Haruo Imagawa<sup>a</sup>, Shu Yin<sup>b</sup>, Kazunobu Kojima<sup>b</sup>,  
Shigefusa F. Chichibu<sup>b</sup> and Tsugio Sato<sup>b</sup>

<sup>a</sup> Toyota Central R&D Labs., Inc., 41-1 Yokomichi Nagakute, Aichi 480-1192, Japan  
E-mail: h-itahara@mosk.tytlabs.co.jp

<sup>b</sup> Institute of Multidisciplinary Research for Advanced Materials, Tohoku University,  
2-1-1 Katahira, Aoba-ku, Sendai 980-8577, Japan.

### [Evaluation procedures of photocatalytic activity for NO decomposition]

We used a continuous reactor (see, Fig. S1) to determine the photocatalytic activity for NO decomposition [S. Yin, H. Hasegawa, D. Maeda, M. Ishitsuka and T. Sato, *Journal of Photochemistry and Photobiology A: Chemistry*, 2004, **163**, 1-8.]. The evaluation was followed by the established procedures in the Japanese Industrial Standard [*Japanese Standards Association, Japanese Industrial Standard R1701-1:2004*]. The powder samples were packed in the groove of the holder ( $20 \times 20 \times 0.2 \text{ mm}^3$ ) and the decrease in the concentration of NO gas was measured at the outlet of the reactor. A test gas of 1 ppm NO-50 vol% air (balance  $\text{N}_2$ ) was flowed at constant rate of 200 mL/min. The test gas was flowed continuously for 10 min to achieve a balance between diffusion and adsorption prior to light irradiation. We set the wavelength of the irradiated light to  $>290 \text{ nm}$  (450 W high-pressure mercury lamp equipped with Pyrex glass as a filter) or  $>400 \text{ nm}$  with the ultraviolet emission filtered out.

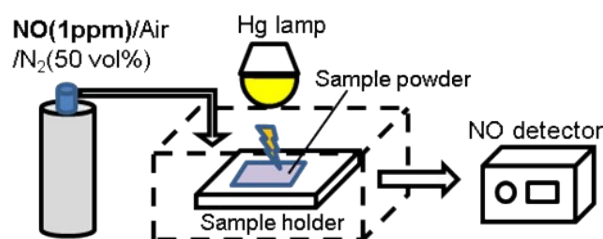

**Figure S1.** Schematic illustration of the evaluation apparatus to determine the photocatalytic activity for NO decomposition
